# Supplementary material
Source: Hindawi journal article supplement (doi:10.1155/2011/145615)
Supplement: f1 [file 145615.f1.pdf]

**Supplementary Table 1.** Trends in hospital-based primary acute myocardial infarction diagnoses in men with prevalent diabetes mellitus in the United States: 1997-2006

| Age (years) | Year | Weighted Total Number AMIs | Frequency with Diabetes | Percent with Diabetes | Standard error |
|-------------|------|----------------------------|-------------------------|-----------------------|----------------|
| < 55        | 1997 | 111049                     | 12748                   | 11.48%                | 0.26%          |
|             | 1998 | 110382                     | 14597                   | 13.22%                | 0.26%          |
|             | 1999 | 106265                     | 14699                   | 13.83%                | 0.30%          |
|             | 2000 | 113889                     | 17917                   | 15.73%                | 0.31%          |
|             | 2001 | 113543                     | 18650                   | 16.43%                | 0.30%          |
|             | 2002 | 114295                     | 20110                   | 17.59%                | 0.30%          |
|             | 2003 | 112925                     | 20373                   | 18.04%                | 0.35%          |
|             | 2004 | 102343                     | 19488                   | 19.04%                | 0.38%          |
|             | 2005 | 99725                      | 19874                   | 19.93%                | 0.35%          |
|             | 2006 | 106905                     | 22667                   | 21.20%                | 0.37%          |
| 55-64       | 1997 | 97283                      | 17418                   | 17.90%                | 0.31%          |
|             | 1998 | 99971                      | 19854                   | 19.86%                | 0.33%          |
|             | 1999 | 95448                      | 20959                   | 21.96%                | 0.39%          |
|             | 2000 | 99471                      | 23095                   | 23.22%                | 0.37%          |
|             | 2001 | 100400                     | 24292                   | 24.20%                | 0.36%          |
|             | 2002 | 103196                     | 26607                   | 25.78%                | 0.38%          |
|             | 2003 | 104074                     | 26949                   | 25.89%                | 0.45%          |
|             | 2004 | 97942                      | 27240                   | 27.81%                | 0.47%          |
|             | 2005 | 92858                      | 26503                   | 28.54%                | 0.40%          |
|             | 2006 | 100005                     | 28250                   | 28.25%                | 0.42%          |
| 65-74       | 1997 | 117610                     | 23539                   | 20.01%                | 0.36%          |
|             | 1998 | 116251                     | 26786                   | 23.04%                | 0.35%          |
|             | 1999 | 107992                     | 27045                   | 25.04%                | 0.37%          |
|             | 2000 | 110878                     | 28780                   | 25.96%                | 0.36%          |
|             | 2001 | 108376                     | 30087                   | 27.76%                | 0.39%          |
|             | 2002 | 103958                     | 30260                   | 29.11%                | 0.44%          |
|             | 2003 | 98170                      | 30076                   | 30.64%                | 0.49%          |
|             | 2004 | 91740                      | 28196                   | 30.73%                | 0.49%          |
|             | 2005 | 85001                      | 27608                   | 32.48%                | 0.46%          |
|             | 2006 | 86613                      | 29304                   | 33.83%                | 0.51%          |
| 75-84       | 1997 | 88270                      | 16888                   | 19.13%                | 0.36%          |
|             | 1998 | 92412                      | 19871                   | 21.50%                | 0.36%          |
|             | 1999 | 90888                      | 21441                   | 23.59%                | 0.37%          |
|             | 2000 | 95059                      | 22770                   | 23.95%                | 0.37%          |
|             | 2001 | 96114                      | 24751                   | 25.75%                | 0.39%          |
|             | 2002 | 92865                      | 25279                   | 27.22%                | 0.38%          |
|             | 2003 | 91182                      | 25668                   | 28.15%                | 0.48%          |
|             | 2004 | 84472                      | 24201                   | 28.65%                | 0.50%          |
|             | 2005 | 78966                      | 23791                   | 30.13%                | 0.48%          |
|             | 2006 | 77626                      | 24191                   | 31.16%                | 0.54%          |
| > 84        | 1997 | 26886                      | 4000                    | 14.88%                | 0.53%          |
|             | 1998 | 29809                      | 4802                    | 16.11%                | 0.49%          |
|             | 1999 | 31985                      | 5481                    | 17.14%                | 0.53%          |
|             | 2000 | 33043                      | 6316                    | 19.11%                | 0.55%          |
|             | 2001 | 36470                      | 6885                    | 18.88%                | 0.52%          |
|             | 2002 | 35600                      | 7172                    | 20.15%                | 0.51%          |
|             | 2003 | 36030                      | 7667                    | 21.28%                | 0.51%          |
|             | 2004 | 34460                      | 7403                    | 21.48%                | 0.55%          |
|             | 2005 | 35341                      | 7985                    | 22.59%                | 0.59%          |
|             | 2006 | 33041                      | 7642                    | 23.13%                | 0.59%          |

**Supplementary Table 2.** Trends in hospital-based primary acute myocardial infarction diagnoses in women with prevalent diabetes mellitus in the United States: 1997-2006

| Age (years) | Year | Weighted Total Number of AMIs | Frequency with Diabetes | Percent with Diabetes | Standard error |
|-------------|------|-------------------------------|-------------------------|-----------------------|----------------|
| < 55        | 1997 | 32083                         | 5190                    | 16.18%                | 0.51%          |
|             | 1998 | 33332                         | 6285                    | 18.86%                | 0.47%          |
|             | 1999 | 32700                         | 6702                    | 20.50%                | 0.52%          |
|             | 2000 | 35987                         | 8021                    | 22.29%                | 0.52%          |
|             | 2001 | 36479                         | 8388                    | 22.99%                | 0.53%          |
|             | 2002 | 38413                         | 9448                    | 24.60%                | 0.53%          |
|             | 2003 | 37125                         | 9252                    | 24.92%                | 0.60%          |
|             | 2004 | 35074                         | 9210                    | 26.26%                | 0.61%          |
|             | 2005 | 34143                         | 9591                    | 28.09%                | 0.69%          |
|             | 2006 | 36801                         | 10881                   | 29.57%                | 0.61%          |
| 55-64       | 1997 | 42397                         | 8967                    | 21.15%                | 0.53%          |
|             | 1998 | 43171                         | 10665                   | 24.70%                | 0.56%          |
|             | 1999 | 40818                         | 11250                   | 27.56%                | 0.59%          |
|             | 2000 | 45132                         | 13350                   | 29.58%                | 0.60%          |
|             | 2001 | 44577                         | 13349                   | 29.95%                | 0.58%          |
|             | 2002 | 45454                         | 14569                   | 32.05%                | 0.62%          |
|             | 2003 | 46491                         | 16046                   | 34.51%                | 0.60%          |
|             | 2004 | 42730                         | 15007                   | 35.12%                | 0.67%          |
|             | 2005 | 41347                         | 15649                   | 37.85%                | 0.64%          |
|             | 2006 | 43251                         | 16584                   | 38.34%                | 0.68%          |
| 65-74       | 1997 | 76684                         | 17540                   | 22.87%                | 0.47%          |
|             | 1998 | 76895                         | 20052                   | 26.08%                | 0.45%          |
|             | 1999 | 71772                         | 20730                   | 28.88%                | 0.53%          |
|             | 2000 | 73887                         | 22304                   | 30.19%                | 0.49%          |
|             | 2001 | 72432                         | 23074                   | 31.86%                | 0.45%          |
|             | 2002 | 69900                         | 23414                   | 33.50%                | 0.51%          |
|             | 2003 | 66592                         | 23335                   | 35.04%                | 0.58%          |
|             | 2004 | 61595                         | 21553                   | 34.99%                | 0.64%          |
|             | 2005 | 55813                         | 20557                   | 36.83%                | 0.60%          |
|             | 2006 | 54959                         | 20950                   | 38.12%                | 0.65%          |
| 75-84       | 1997 | 90268                         | 18074                   | 20.02%                | 0.39%          |
|             | 1998 | 93357                         | 21194                   | 22.70%                | 0.38%          |
|             | 1999 | 92630                         | 22951                   | 24.78%                | 0.38%          |
|             | 2000 | 98022                         | 24883                   | 25.39%                | 0.39%          |
|             | 2001 | 100043                        | 27103                   | 27.09%                | 0.37%          |
|             | 2002 | 95790                         | 27175                   | 28.37%                | 0.40%          |
|             | 2003 | 92827                         | 27167                   | 29.27%                | 0.44%          |
|             | 2004 | 85551                         | 25458                   | 29.76%                | 0.47%          |
|             | 2005 | 79595                         | 24759                   | 31.11%                | 0.53%          |
|             | 2006 | 76774                         | 24922                   | 32.46%                | 0.54%          |
| > 84        | 1997 | 46883                         | 6826                    | 14.56%                | 0.41%          |
|             | 1998 | 52788                         | 8779                    | 16.63%                | 0.42%          |
|             | 1999 | 55845                         | 10061                   | 18.02%                | 0.42%          |
|             | 2000 | 59631                         | 11442                   | 19.19%                | 0.40%          |
|             | 2001 | 63477                         | 11889                   | 18.73%                | 0.39%          |
|             | 2002 | 63422                         | 12709                   | 20.04%                | 0.41%          |
|             | 2003 | 63335                         | 13210                   | 20.86%                | 0.42%          |
|             | 2004 | 58390                         | 11964                   | 20.49%                | 0.44%          |
|             | 2005 | 58667                         | 12816                   | 21.85%                | 0.44%          |
|             | 2006 | 56268                         | 12650                   | 22.48%                | 0.41%          |
